# Supplementary material for: Variant phasing and haplotypic expression from long-read sequencing in maize
Source: PubMed Central journal article supplement (PMC7028979; doi:10.1038/s42003-020-0805-8), 2020-02-18
Supplement: 42003_2020_805_MOESM1_ESM.pdf [file 42003_2020_805_MOESM1_ESM.pdf]

## Supplementary Figures

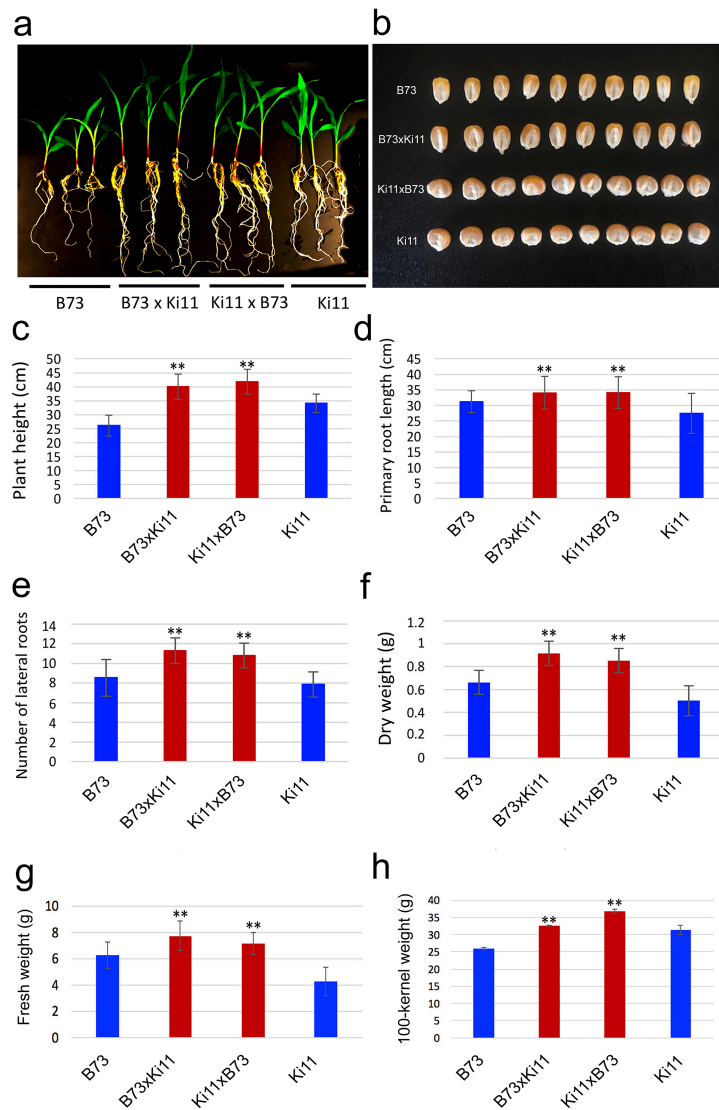

**Supplementary Figure 1. Phenotype of maize B73, Ki11, and two reciprocal hybrids (B73 × Ki11, Ki11 × B73) at 14DAG and measure of different traits between parents and the hybrids.**

(a) Shoot and root phenotype of B73, Ki11, and the two reciprocal hybrids. (b) Seed phenotype of B73, Ki11, and the two hybrids. (c) Plant height, (d) primary root length, (e) lateral root number, (f–g) biomass, and (h) 100-kernel weight of the parents and hybrids. \*\*  $p < 0.01$ . Error bars are S.D. on the three biological replicates, 10 biologically independent plants were used for each replicate.

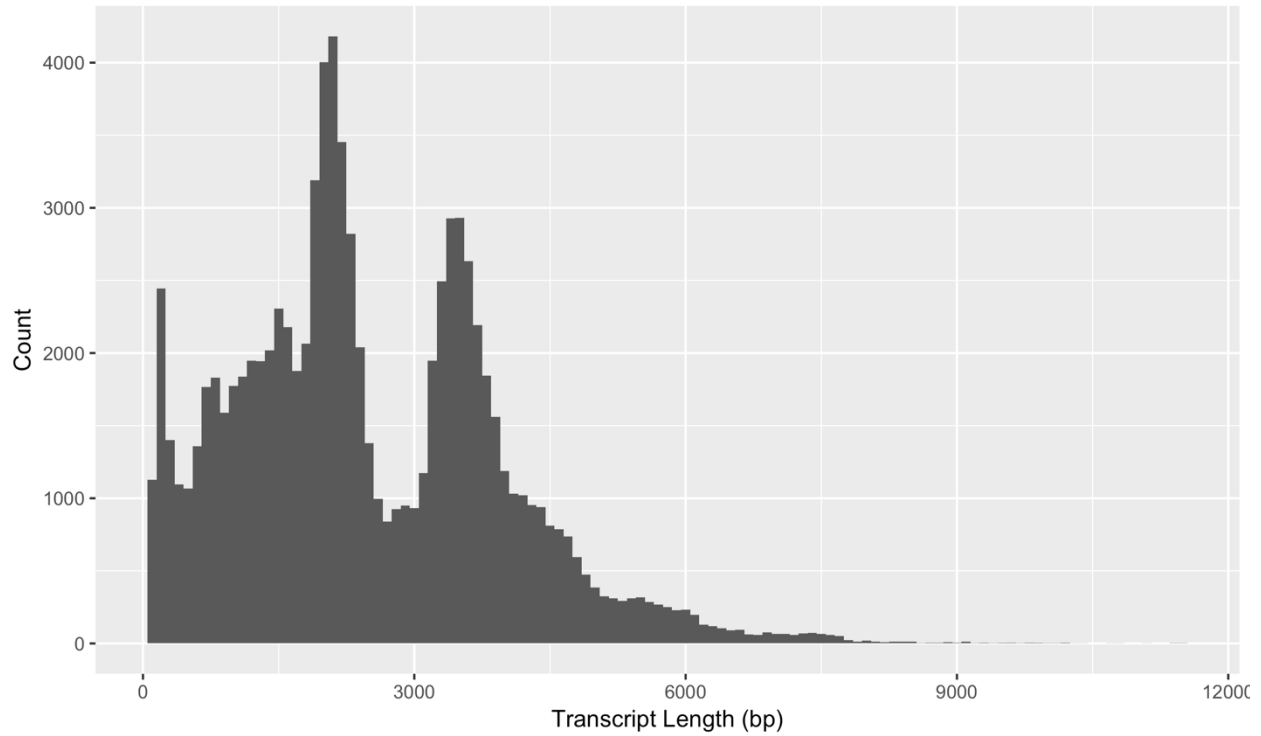

**Supplementary Figure 2. Length distribution of the final transcript set.**

After mapping the high-quality (HQ) sequences to the B73 RefGen\_v4 genome and filtering for coverage, identity, and running the SQANTI software to remove library artifacts, we obtain 75,118 transcripts. Min: 80bp, Max: 11,495 bp, Mean: 2,482 bp, 5<sup>th</sup>-95<sup>th</sup> percentile: 363-4,975 bp.

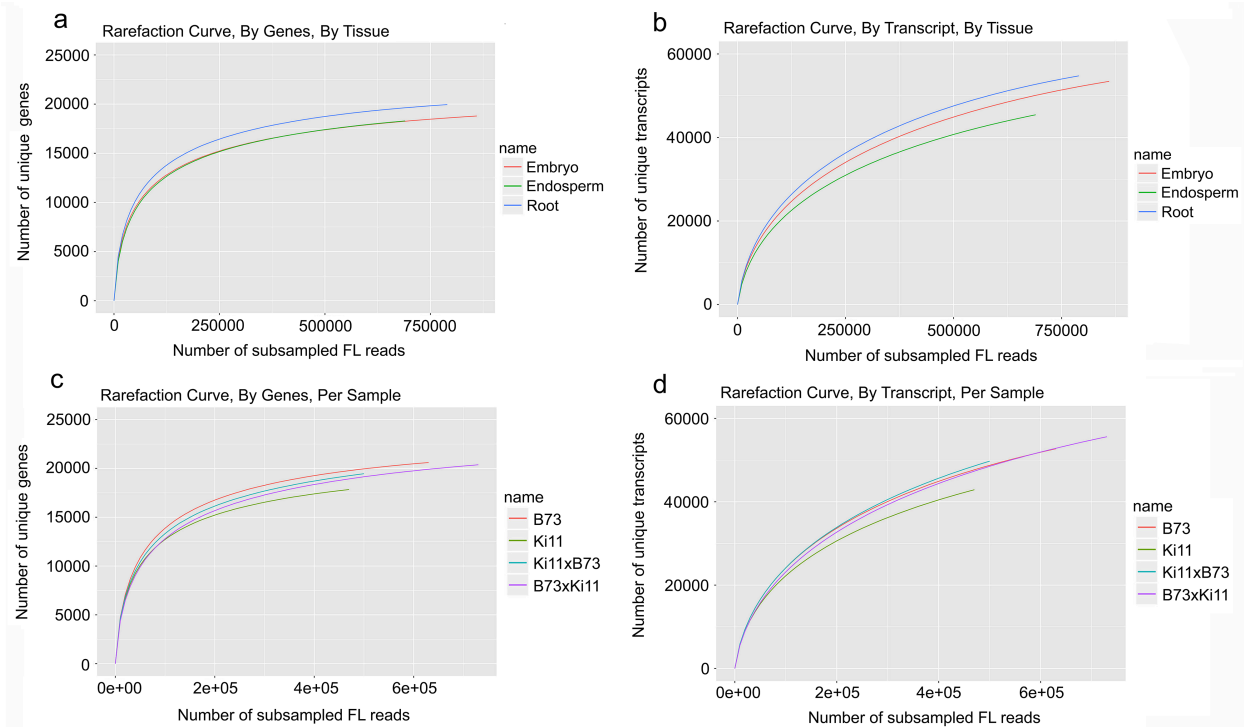

**Supplementary Figure 3. Rarefaction curves against known genes and transcripts (a-b) by strain, (c-d) by tissue.** For each subpanel, the X-axis shows the number of subsampled full-length reads and the Y-axis shows the number of observed unique genes or transcripts. Both known and novel genes/transcripts are considered.

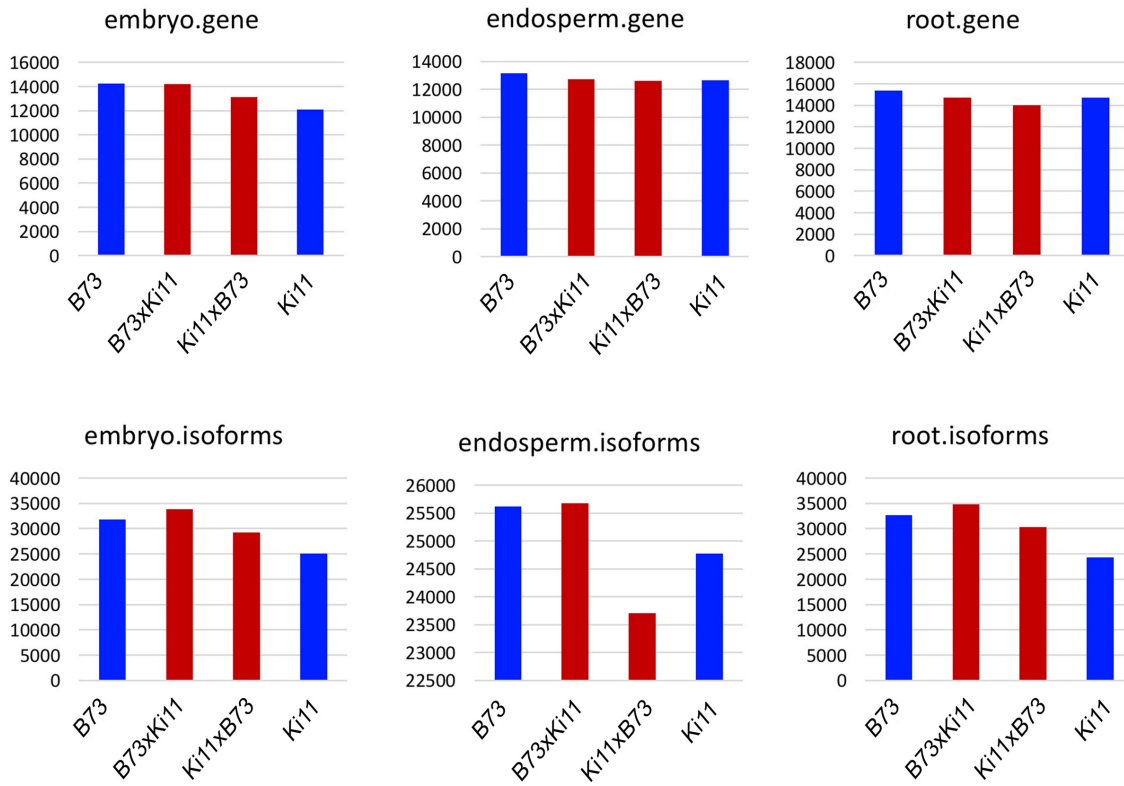

**Supplementary Figure 4. Number of genes and isoforms between parents and two reciprocal hybrids in embryo, endosperm and root tissues.**

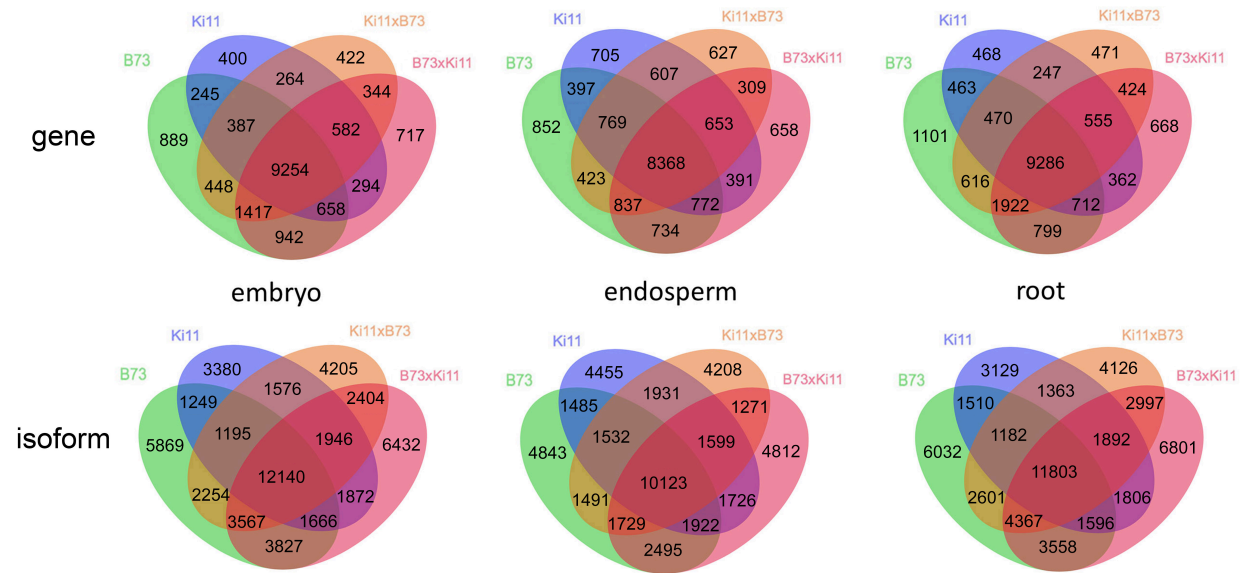

**Supplementary Figure 5. Overlap of genes and isoforms among parents and two hybrids in embryo, endosperm and root.**

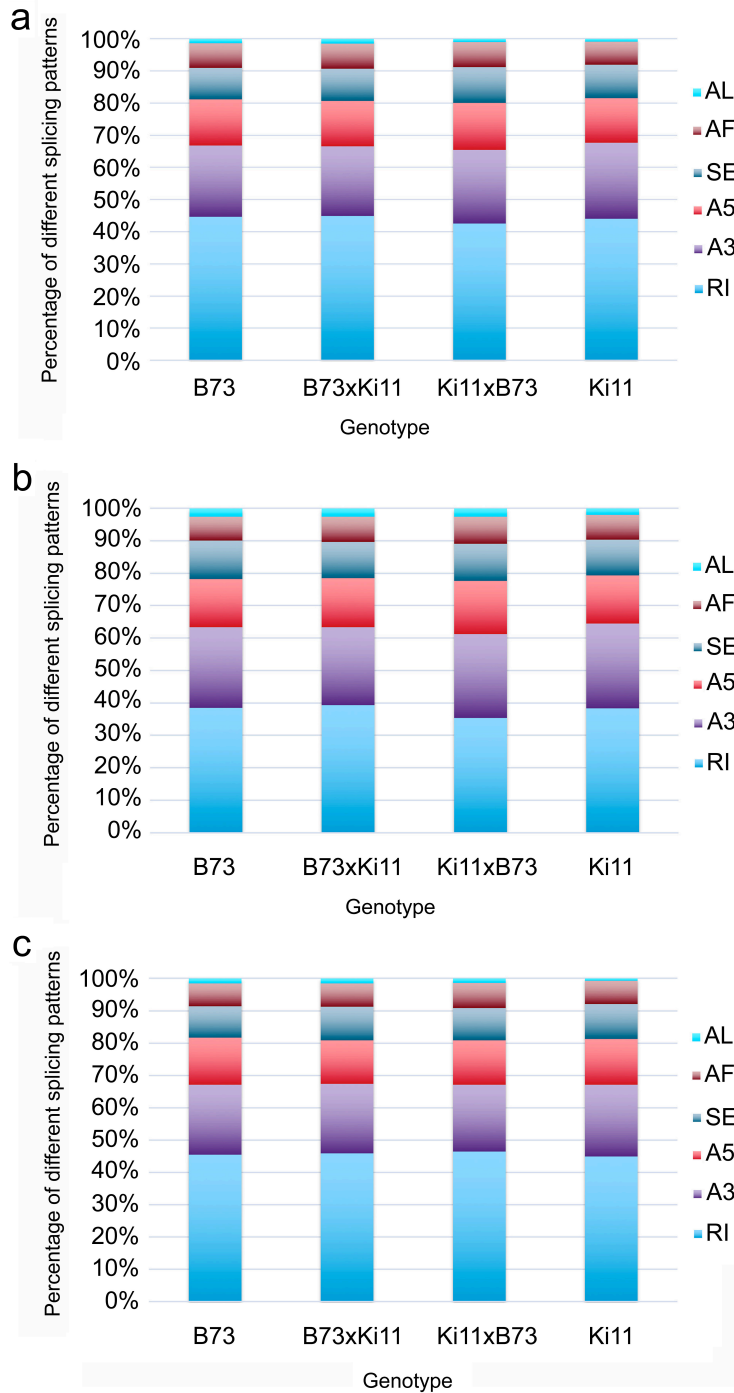

**Supplementary Figure 6. Alternative splicing pattern between parents and two reciprocal hybrids in embryo (a), endosperm (b) and root (c). A3: Alternative 3' splice site; A5: Alternative 5' splice site; AF: Alternative first exon; AL: Alternative last exon; RI: Retained Intron; SE: Skipped exon.**

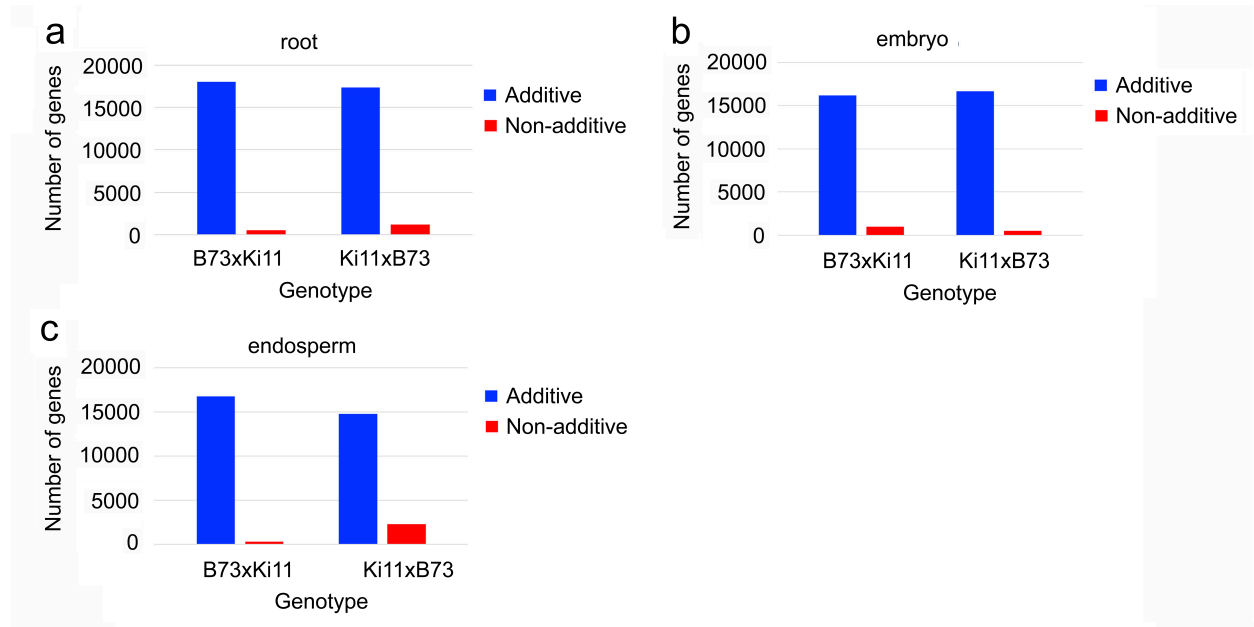

**Supplementary Figure 7. Number of additive and non-additive expression genes in root (a), embryo (b) and endosperm (c).**

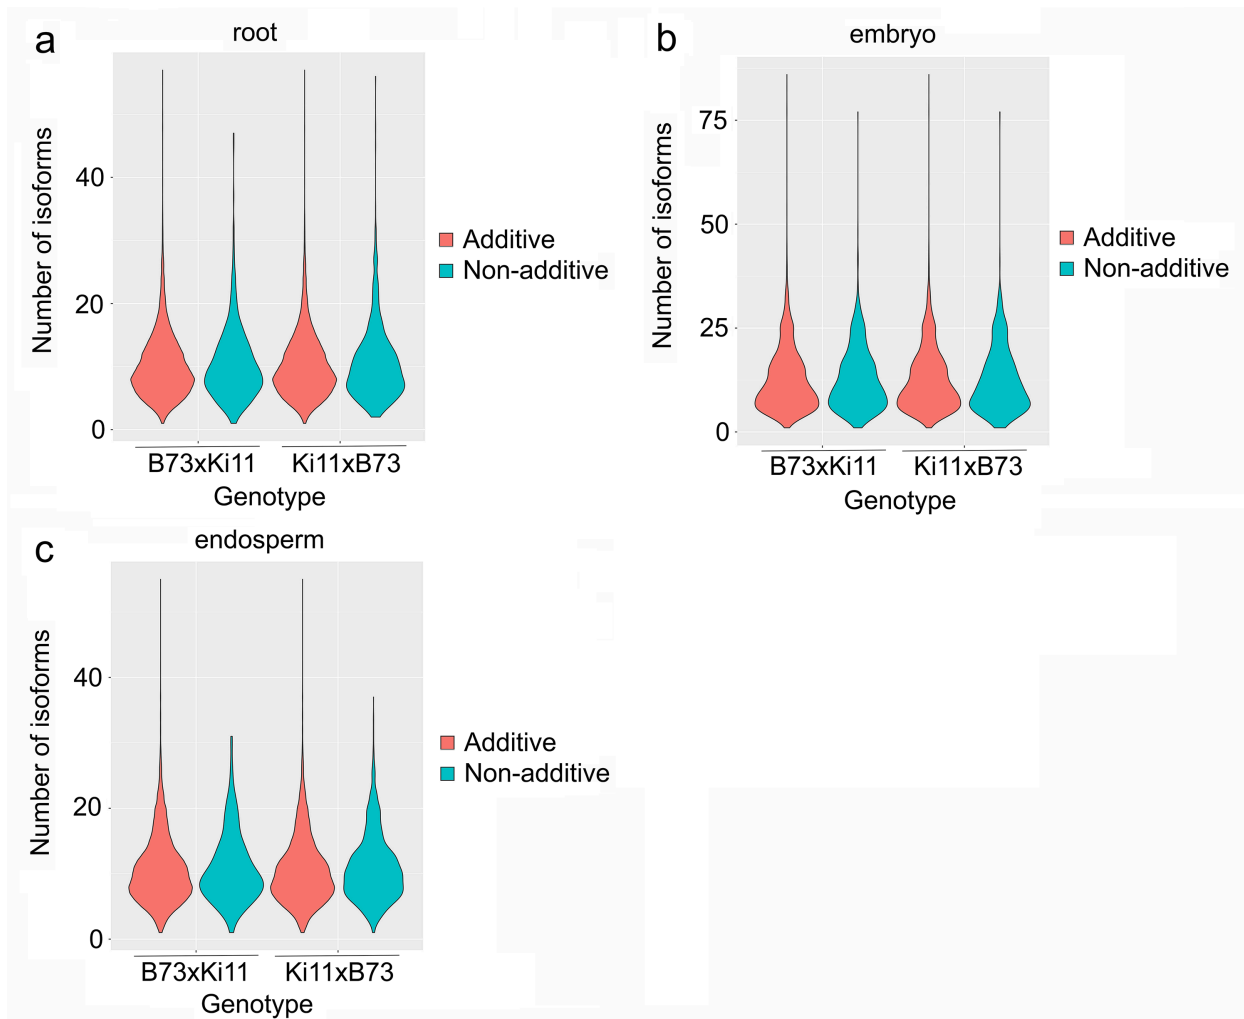

**Supplementary Figure 8. Number of isoforms of additive and non-additive expression genes in root (a), embryo (b) and endosperm (c).**



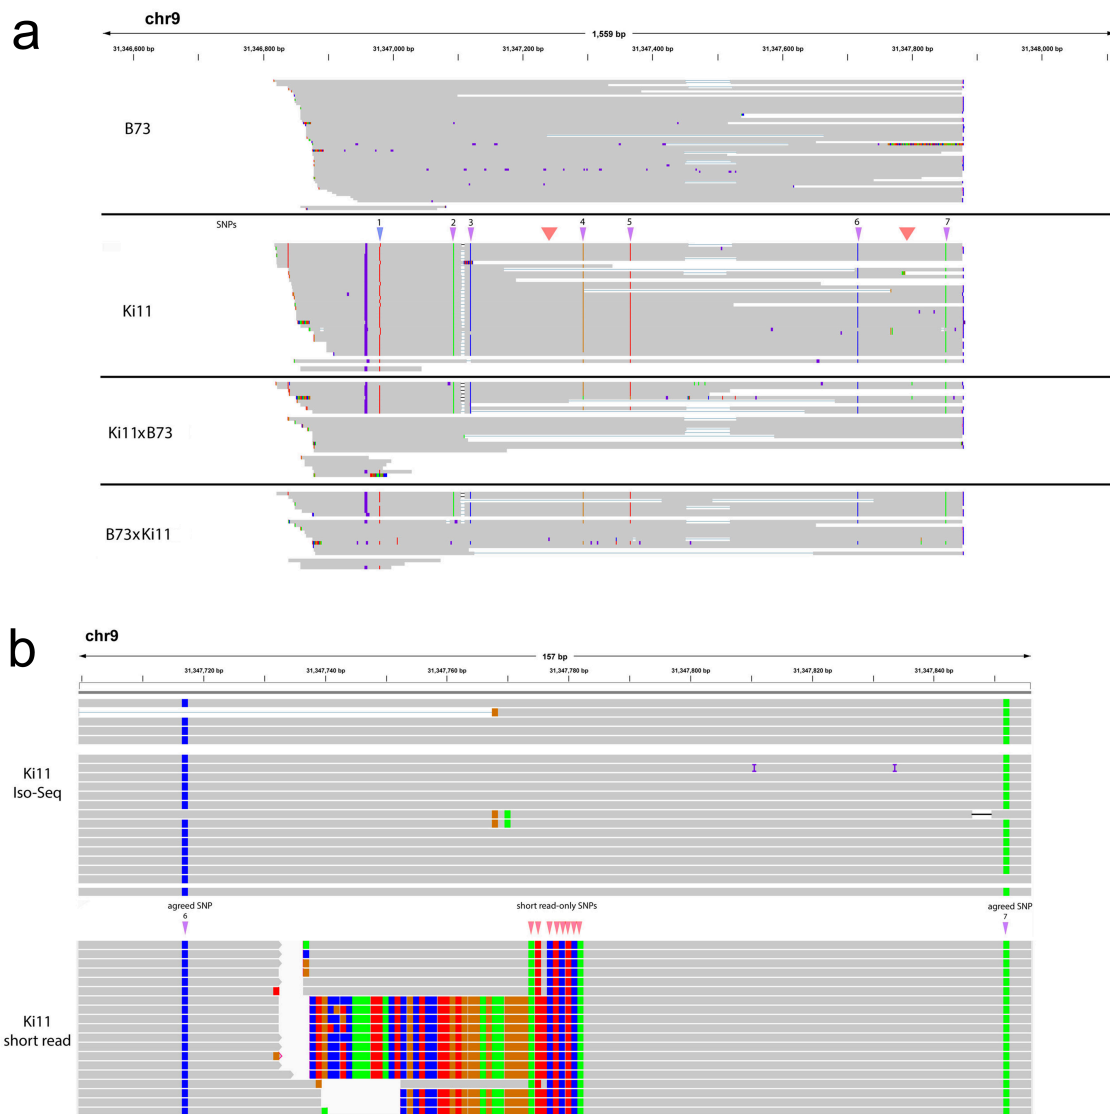

**Supplementary Figure 9. IsoPhase phasing example.** a) The gene PB.21897 (Zm00001d045657) phased by IsoPhase. SNPs are depicted between the B73 and Ki11 tracks, seven SNPs are shown. SNP #2–#7 were called by based on both long- and short-read data (purple), SNP #1 was missed by long-read data due to reduced coverage (blue); suspicious short read-only SNPs are marked in red. b) Zoomed-in region between SNP #6 and SNP #7 showing suspicious SNPs (red) called based on short-read only. Top track shows Ki11 Iso-Seq FL reads; bottom track shows Ki11 short reads.

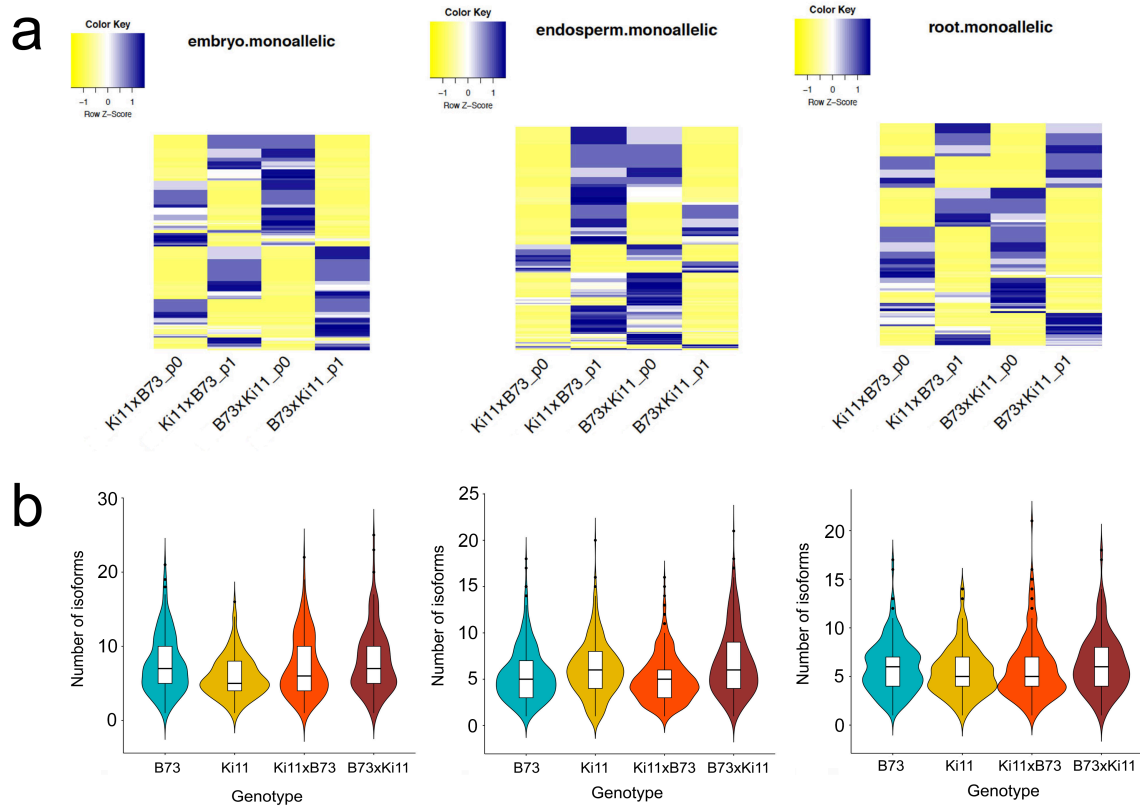

**Supplementary Figure 10. Expression and number of isoforms of mono-allelic genes in different tissues.** a) Allelic expression of mono-allelic genes in reciprocal hybrids, and b) number of isoforms between parents and hybrids of mono-allelic genes. p0 represents the B73 allele; p1 represents the Ki11 allele.

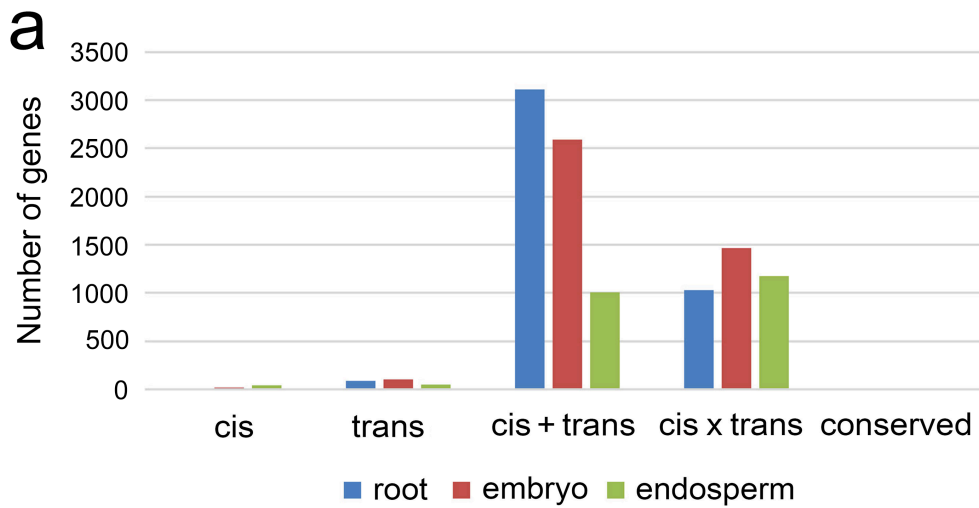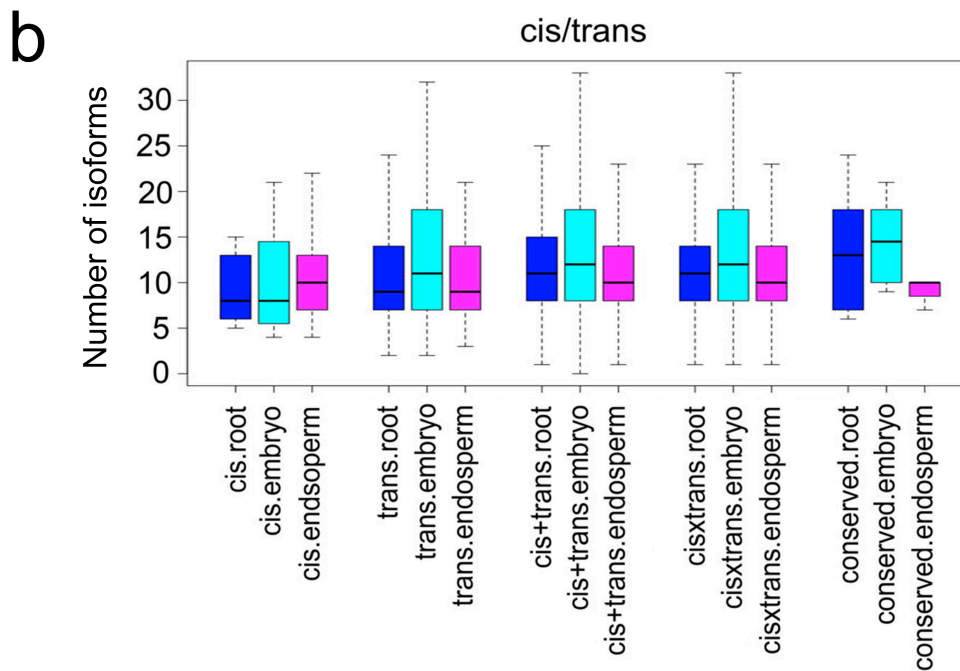

**Supplementary Figure 11. Distribution of cis-, trans-regulated genes, and number of isoforms of each category.** (a) Distribution of different categories of cis-, trans-regulated genes.

(b) Number of isoforms in each category of cis-, trans-regulated genes.

**Supplementary Table 1. 16-mer Barcodes corresponding to the Sample.**

| <b>Sample</b> | <b>Genotype</b> | <b>Barcode Sequence</b> |
|---------------|-----------------|-------------------------|
| Embryo 1      | B73 20 DAP      | TCAGACGATGCGTCAT        |
| Embryo 2      | Ki11 20 DAP     | TACTAGAGTAGCACTC        |
| Embryo 3      | Ki11xB73 20 DAP | GATCTCTACTATATGC        |
| Embryo 4      | B73xKi11 20 DAP | CATAGCGACTATCGTG        |
| Endosperm 1   | B73 20 DAP      | CTATACATGACTCTGC        |
| Endosperm 2   | Ki11 20 DAP     | TGTGTATCAGTACATG        |
| Endosperm 3   | Ki11xB73 20 DAP | ACAGTCTATACTGCTG        |
| Endosperm 4   | B73xKi11 20 DAP | CGAGCACGCGCGTGTG        |
| Root 1        | B73 20 DAP      | GCTCGACTGTGAGAGA        |
| Root 2        | Ki11 20 DAP     | TGCTCGCAGTATCACA        |
| Root 3        | Ki11xB73 20 DAP | TCACACTCTAGAGCGA        |
| Root 4        | B73xKi11 20 DAP | CGCTGCGAGAGACAGT        |

**Supplementary Table 2. Number of full-length, non-concatemer (FLNC)**

**reads from each of the 12 samples after demultiplexing.**

| <b>SAMPLE</b> | <b>NAME</b>        | <b># of FLNC</b> |
|---------------|--------------------|------------------|
| EM1           | B73 Embryo         | 339,048          |
| EM2           | Ki11 Embryo        | 254,342          |
| EM3           | Ki11xB73 Embryo    | 305,307          |
| EM4           | B73xKi11 Embryo    | 444,580          |
| END1          | B73 Endosperm      | 284,678          |
| END2          | Ki11 Endosperm     | 290,122          |
| END3          | Ki11xB73 Endosperm | 232,168          |
| END4          | B73xKi11 Endosperm | 288,205          |
| R1            | B73 Root           | 362,431          |
| R2            | Ki11 Root          | 225,208          |
| R3            | Ki11xB73 Root      | 287,485          |
| R4            | B73xKi11 Root      | 426,238          |
| <b>TOTAL</b>  |                    | <b>3,739,812</b> |

**Supplementary Table 3. Mapping high-quality (HQ) transcript sequences to the genome and filtering criteria.** HQ sequences were mapped to B73 v4 genome and filtered for 99% coverage and 95% identity. Redundant transcripts are collapsed.

| <b>Mapping to Genome</b>                           |                         |
|----------------------------------------------------|-------------------------|
| HQ Isoforms                                        | 250,168                 |
| Mapped to maize v4                                 | 248,424 (99.3%)         |
| Mapped to maize v4 with 99% coverage 95% identity  | 229,757 (91.8%)         |
| <b>After collapse &amp; compare to annotation:</b> |                         |
| Number of unique isoforms                          | 90,419<br>(27,967 loci) |

**Supplementary Table 4. Removal of library artifacts using a modified version of the SQANTI software.**

| <b>Cause of SQANTI Filtering</b>                                        | <b>Transcripts Filtered</b>         |
|-------------------------------------------------------------------------|-------------------------------------|
| <b>BEFORE FILTERING:</b>                                                | 90,419 transcripts<br>(27,967 loci) |
| Intrapriming                                                            | 1402                                |
| RT-switching                                                            | 1906                                |
| Some junctions not canonical and not all junctions short-read-supported | 11993                               |
| <b>AFTER FILTERING:</b>                                                 | 75,118 transcripts<br>(23,412 loci) |

**Supplementary Table 5. Top BLASTN hit counts of the unmapped high-quality (HQ) transcript sequences to the NR database.** BLASTN was run with a report of best hit with E-value cutoff of 0.1; 1669 of 1744 HQ sequences had a BLASTN hit.

| <b>Species</b>           | <b>Sequence_Hit_Counts</b> |
|--------------------------|----------------------------|
| Bipolaris zeicola        | 534                        |
| Zea mays                 | 523                        |
| Cochliobolus sativus     | 200                        |
| Fusarium verticillioides | 162                        |
| Bipolaris maydis         | 63                         |
| Trichoderma virens       | 39                         |
| Bipolaris victoriae      | 17                         |
| Setosphaeria turcica     | 9                          |

**Supplementary Table 6. Sample-specific transcript counts.** Using the demultiplexed full-length reads, we assigned Iso-Seq transcripts back to each sample. If a transcript contained at least one full-length read from a sample, it was considered to be expressed.

| <b>Sample</b>      | <b>Number</b> |
|--------------------|---------------|
| B73-Embryo         | 31,767        |
| B73-Endosperm      | 25,620        |
| B73-Root           | 32,649        |
| Ki11-Embryo        | 25,024        |
| Ki11-Endosperm     | 24,773        |
| Ki11-Root          | 24,281        |
| Ki11xB73-Embryo    | 29,287        |
| Ki11xB73-Endosperm | 23,704        |
| Ki11xB73-Root      | 30,331        |
| B73xKi11-Embryo    | 33,854        |
| B73xKi11-Endosperm | 25,677        |
| B73xKi11-Root      | 34,820        |

**Supplementary Table 7. Fleiss' kappa of gene-level agreement and isoform-level agreement in embryo, endosperm, and root tissue between long and short reads.**

| <b>Tissue</b> | <b>Gene</b> | <b>Isoform</b> |
|---------------|-------------|----------------|
| embryo        | 0.905       | 0.958          |
| endosperm     | 0.915       | 0.964          |
| root          | 0.926       | 0.966          |

Genes and isoforms were assigned to groups of genotypes according to whether they were expressed in each tissue. These assignments were compared to the long-read data assignments using Fleiss' kappa, a statistical measure that calculates the degree of agreement in classification over what would be expected by chance.
